# Supplementary figures and images for: Integrative Analysis of the Core Fruit Lignification Toolbox in Pear Reveals Targets for Fruit Quality Bioengineering
Source: MDPI journal article supplement (doi:10.3390/biom9090504), 2019-09-18

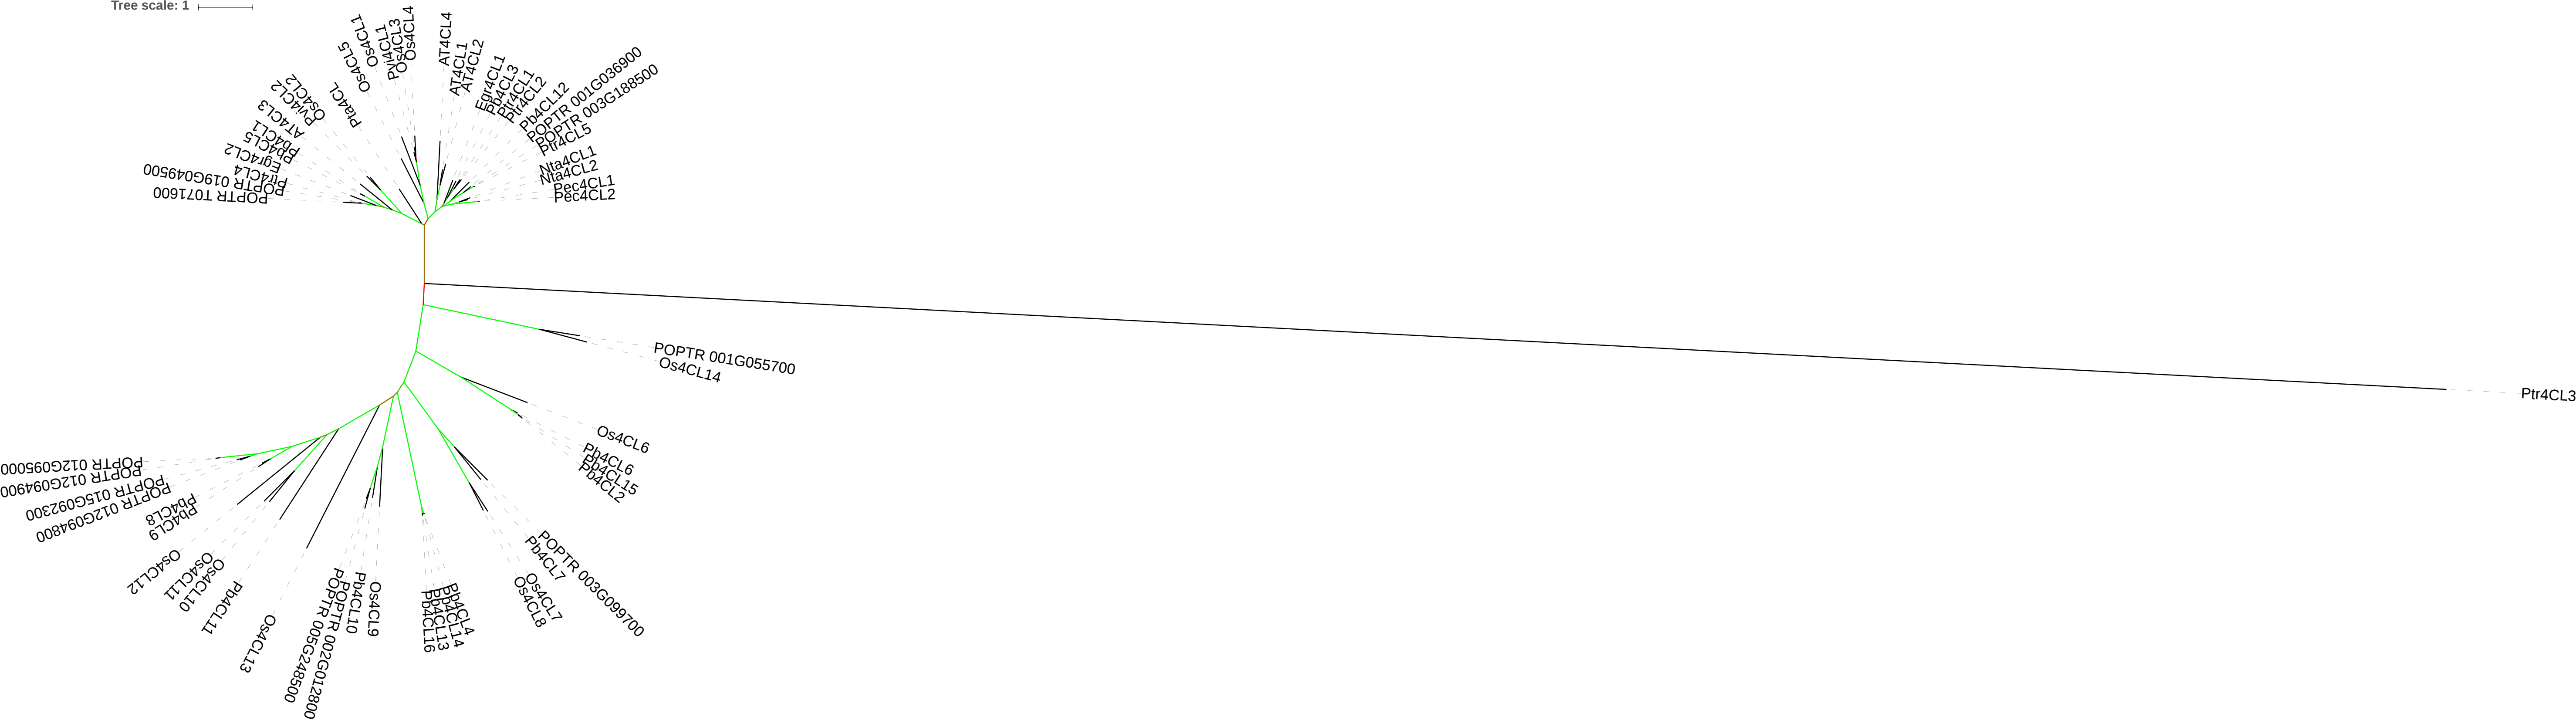

Supplement: s1 [file s1]

Tree scale: 0.1

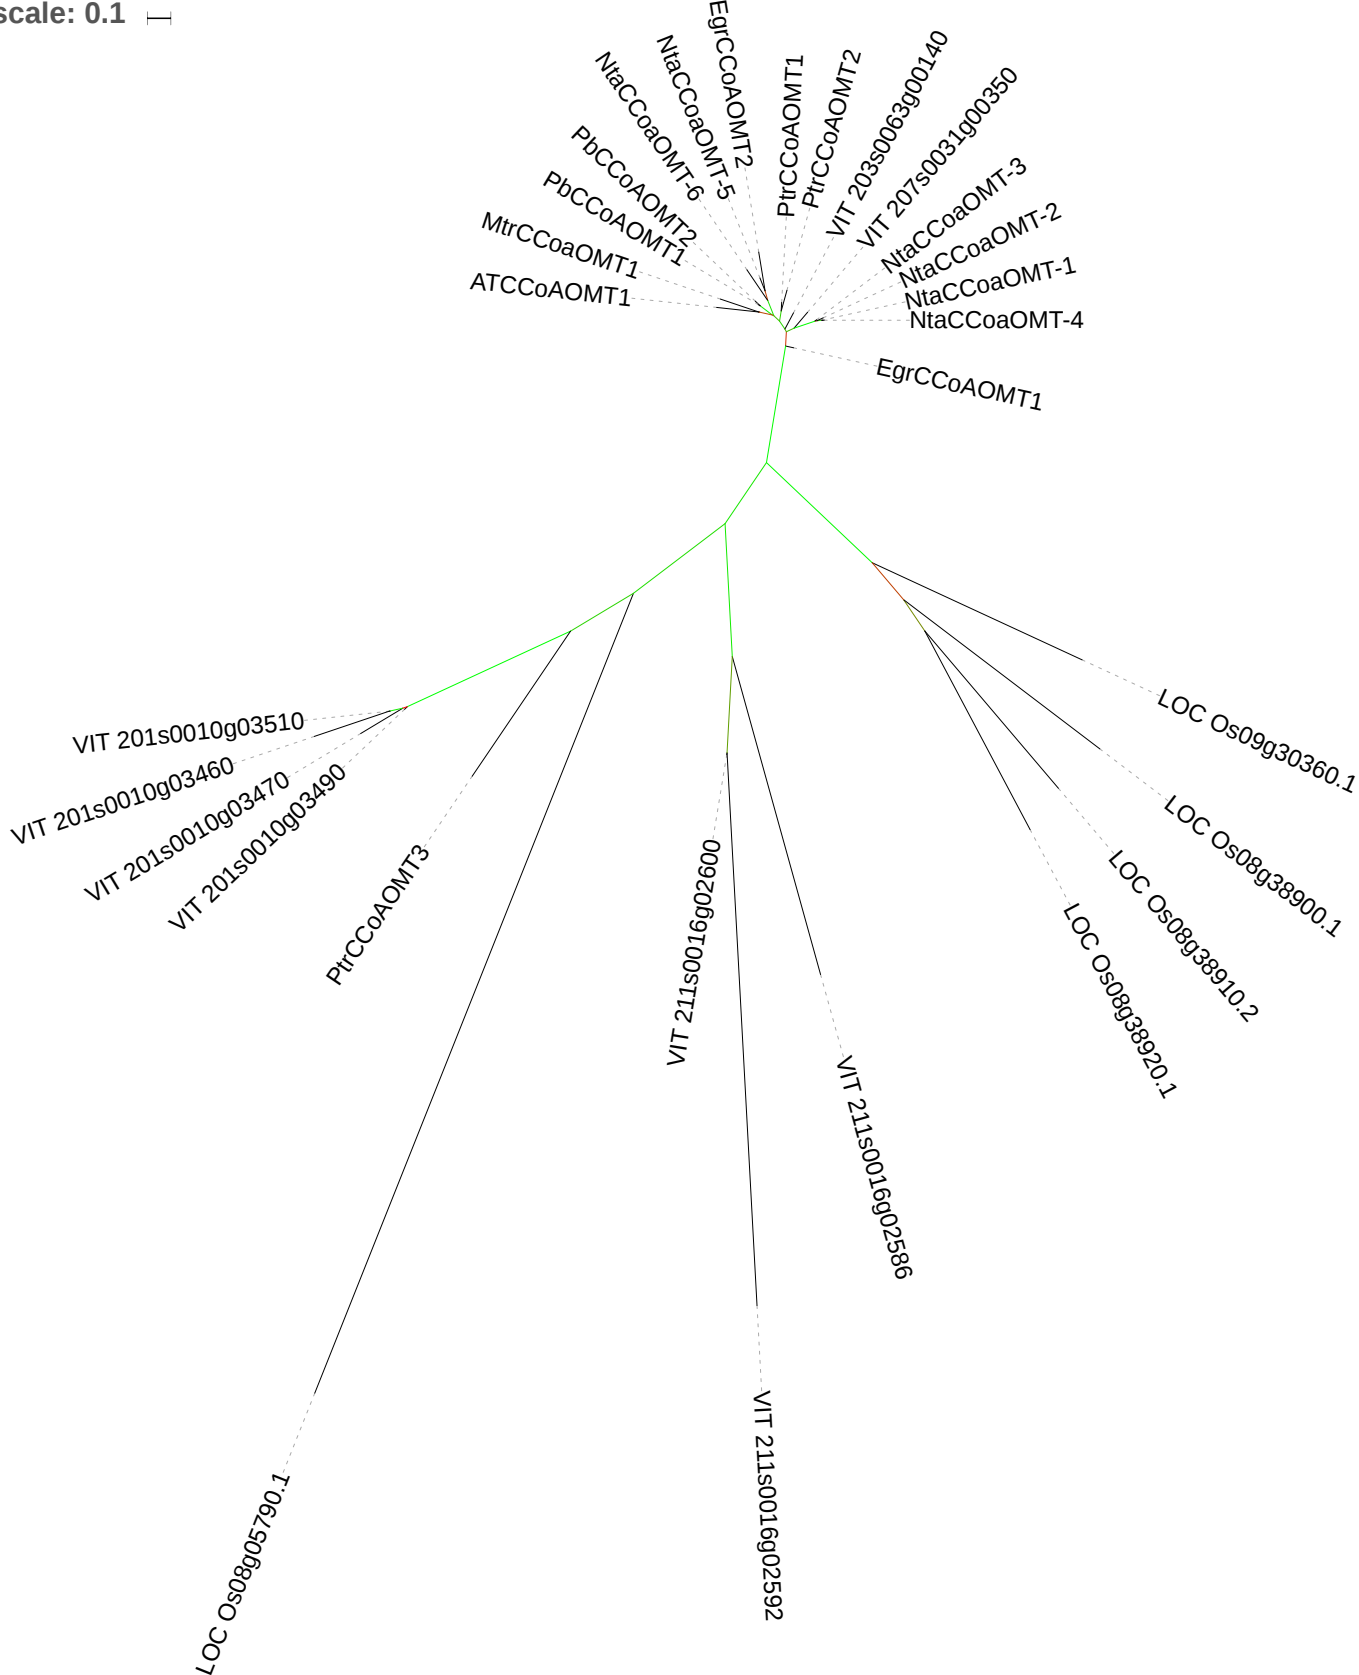

Supplement: s1 [file s1]

Tree scale: 1

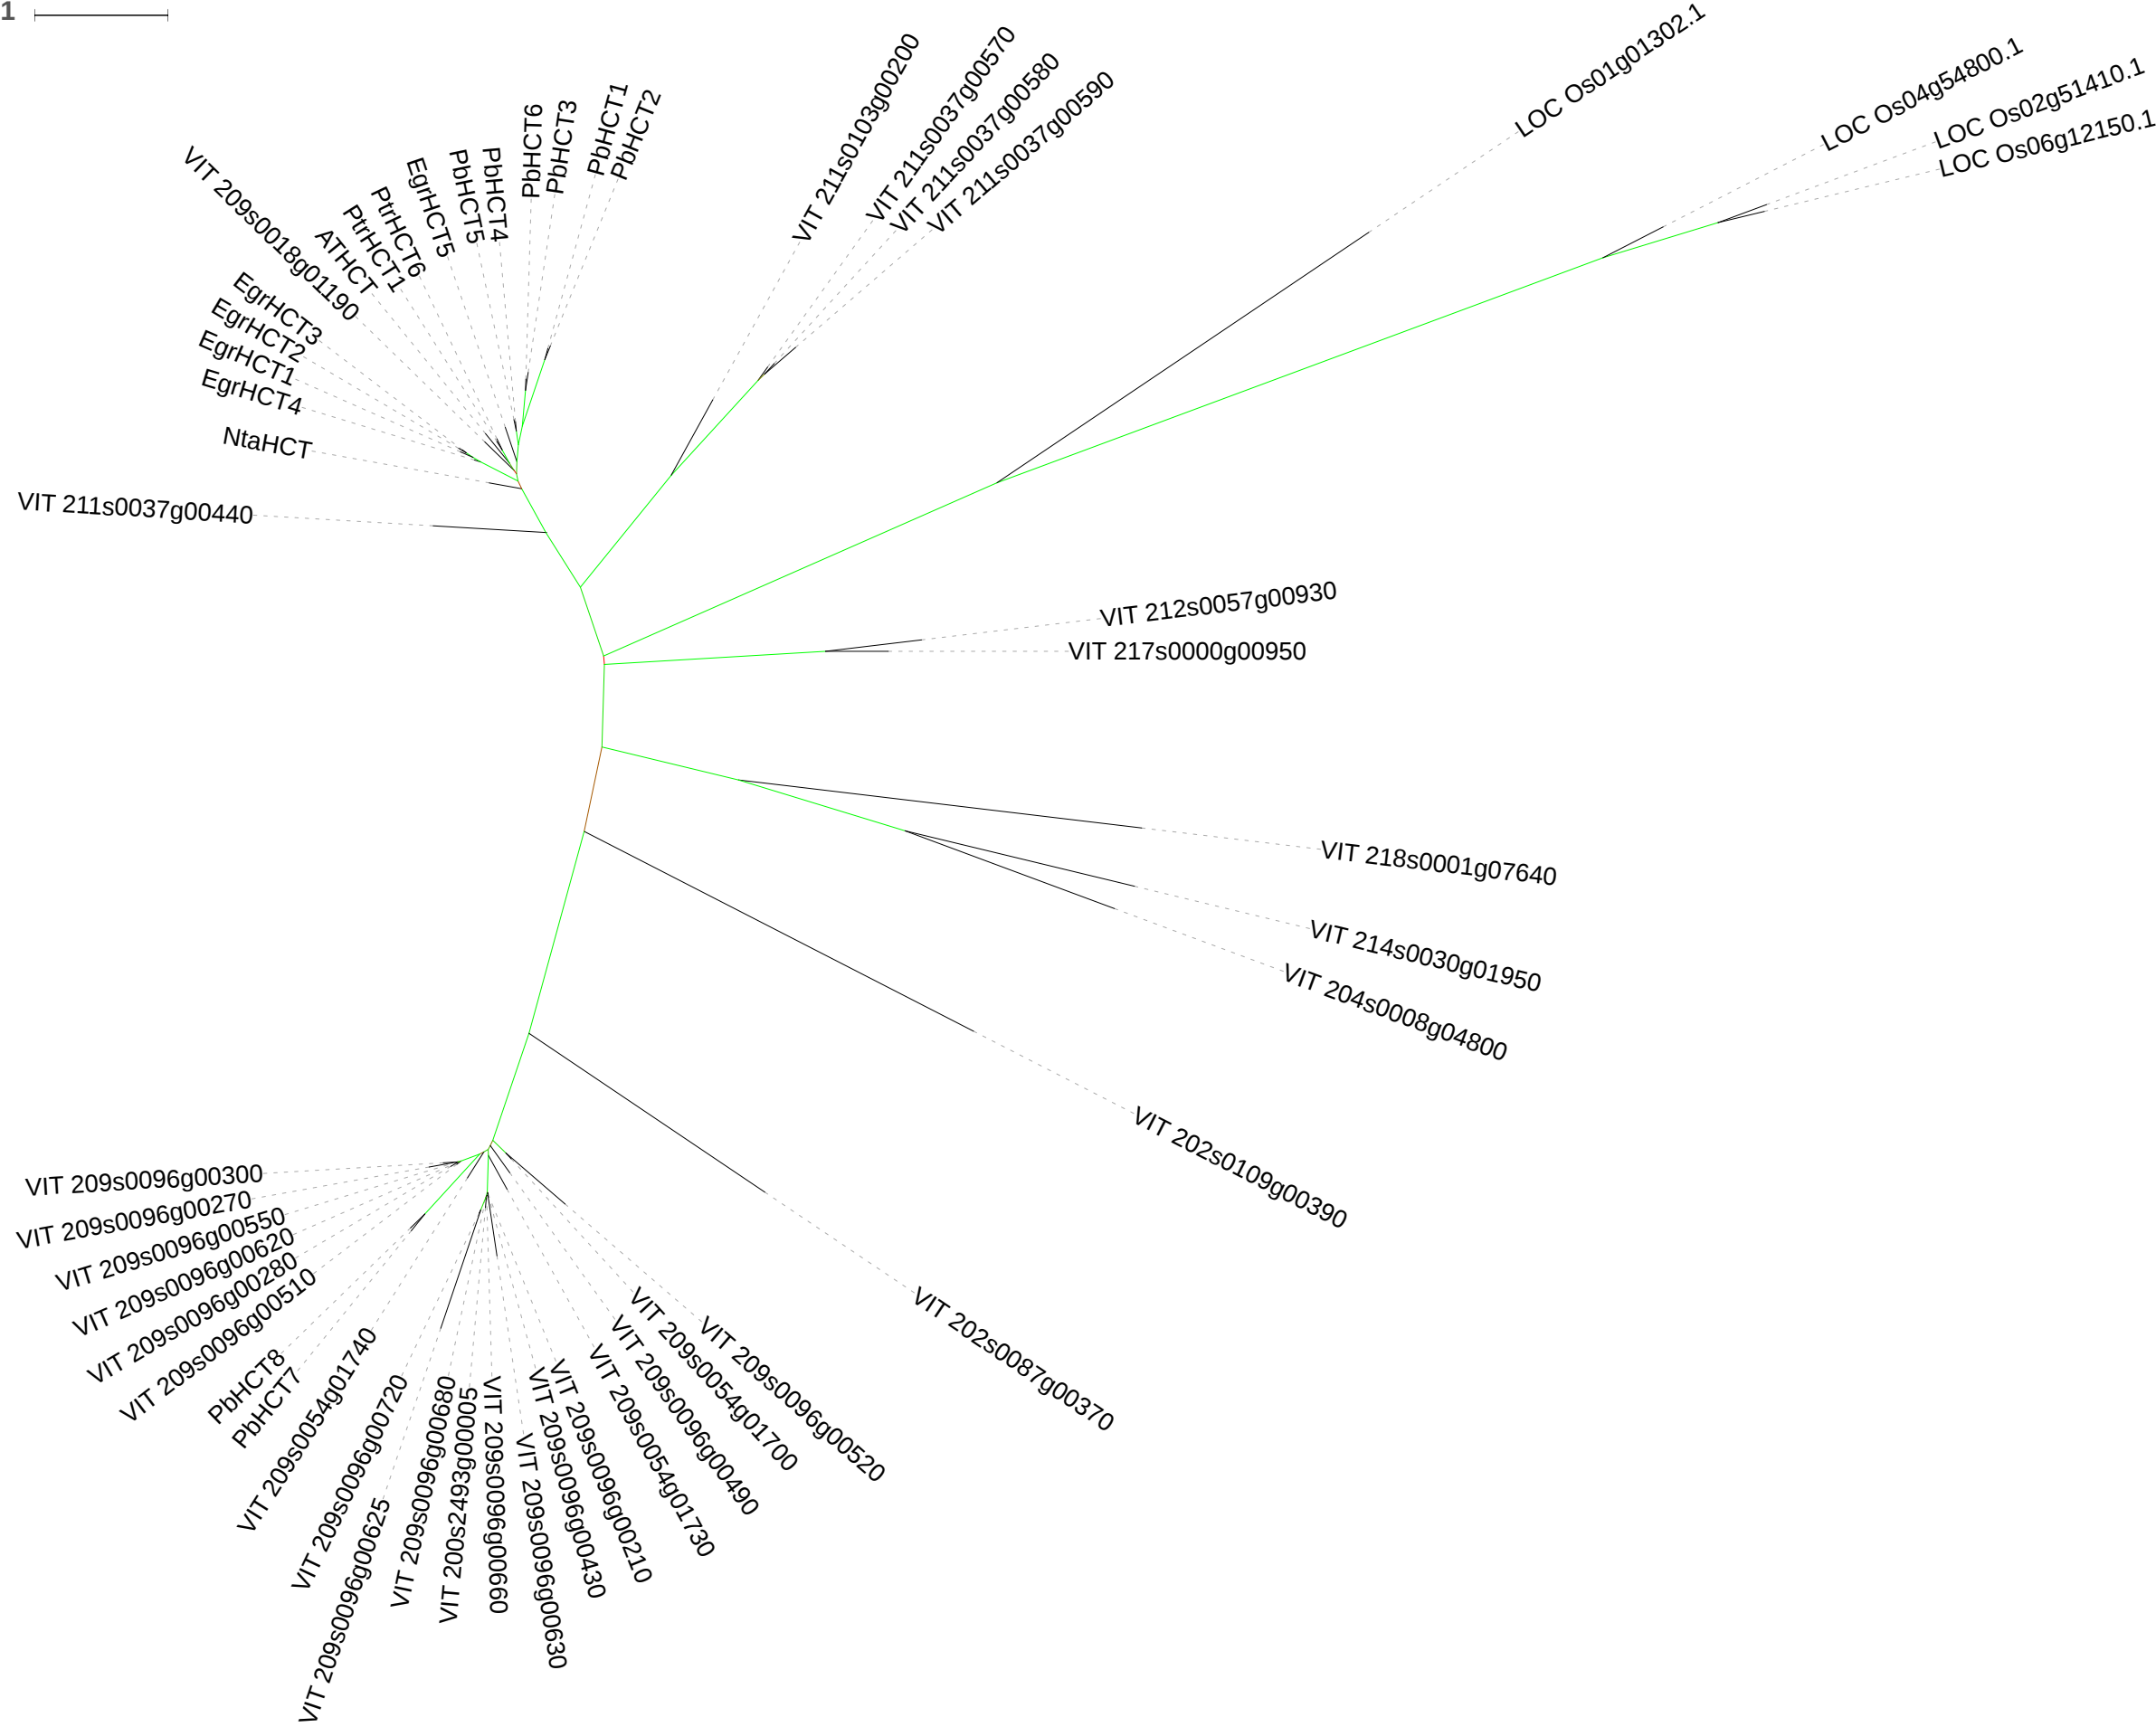

Supplement: s1 [file s1]

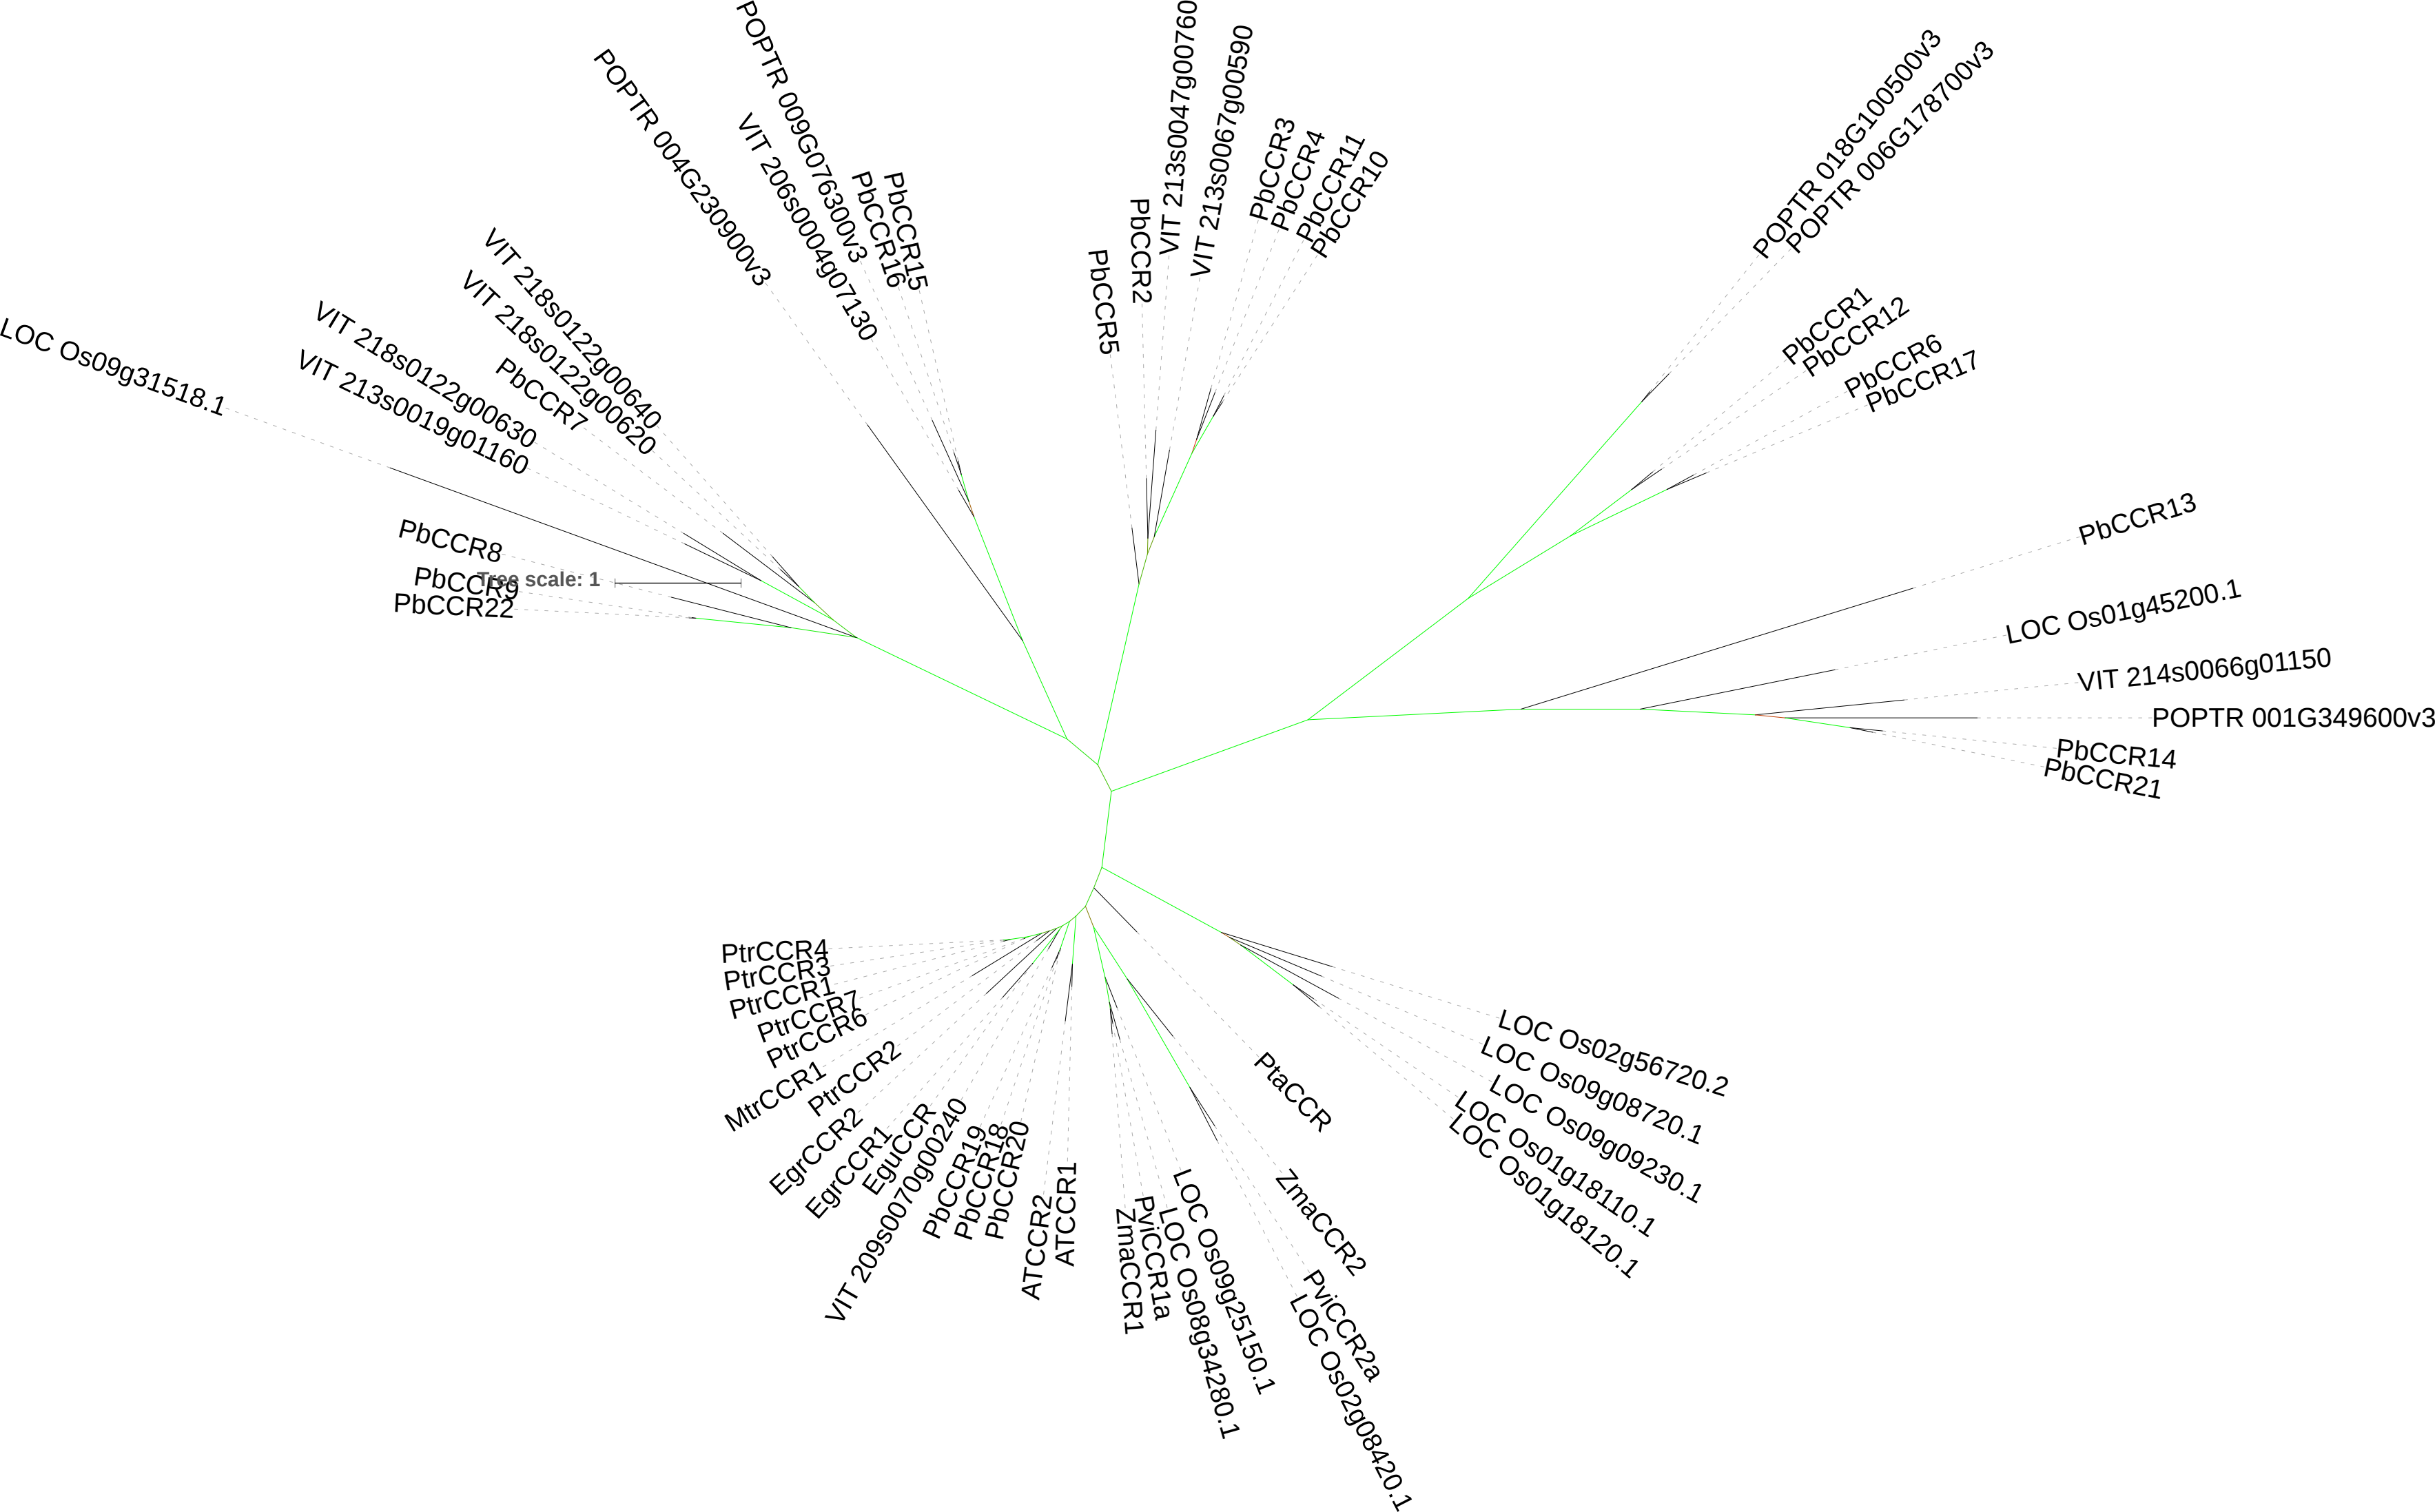

Supplement: s1 [file s1]

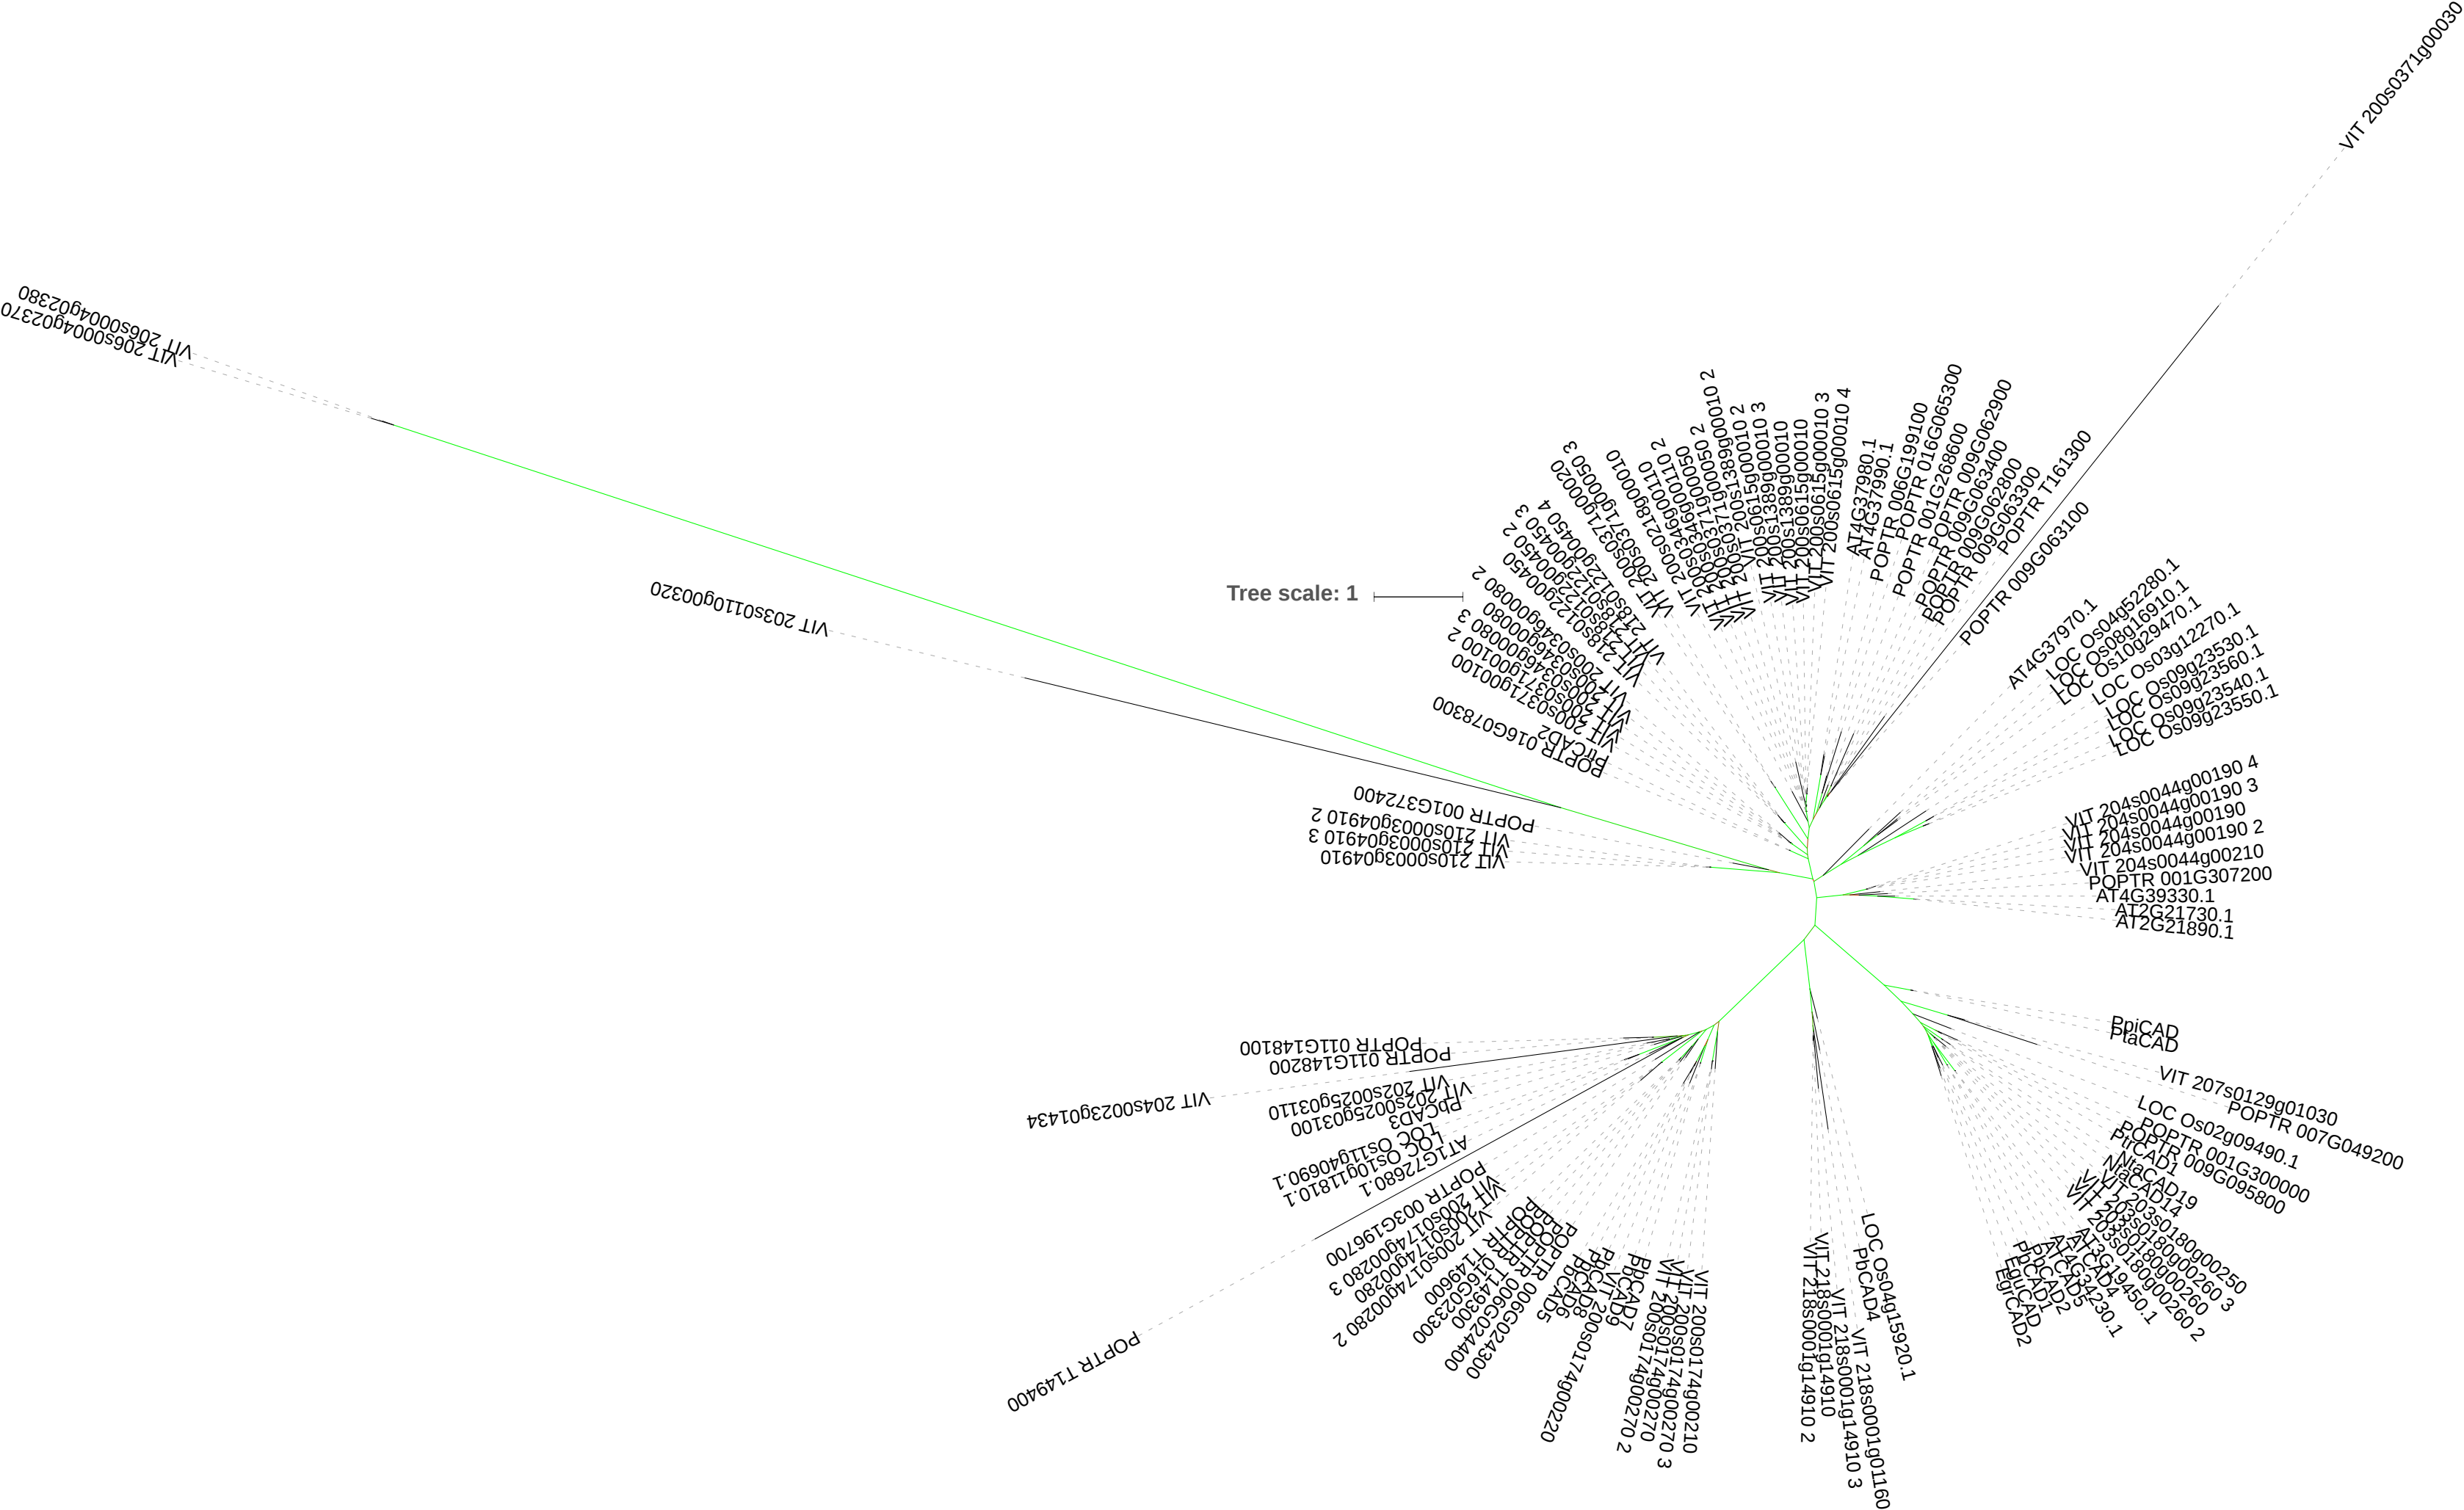

Supplement: s1 [file s1]

Tree scale: 1

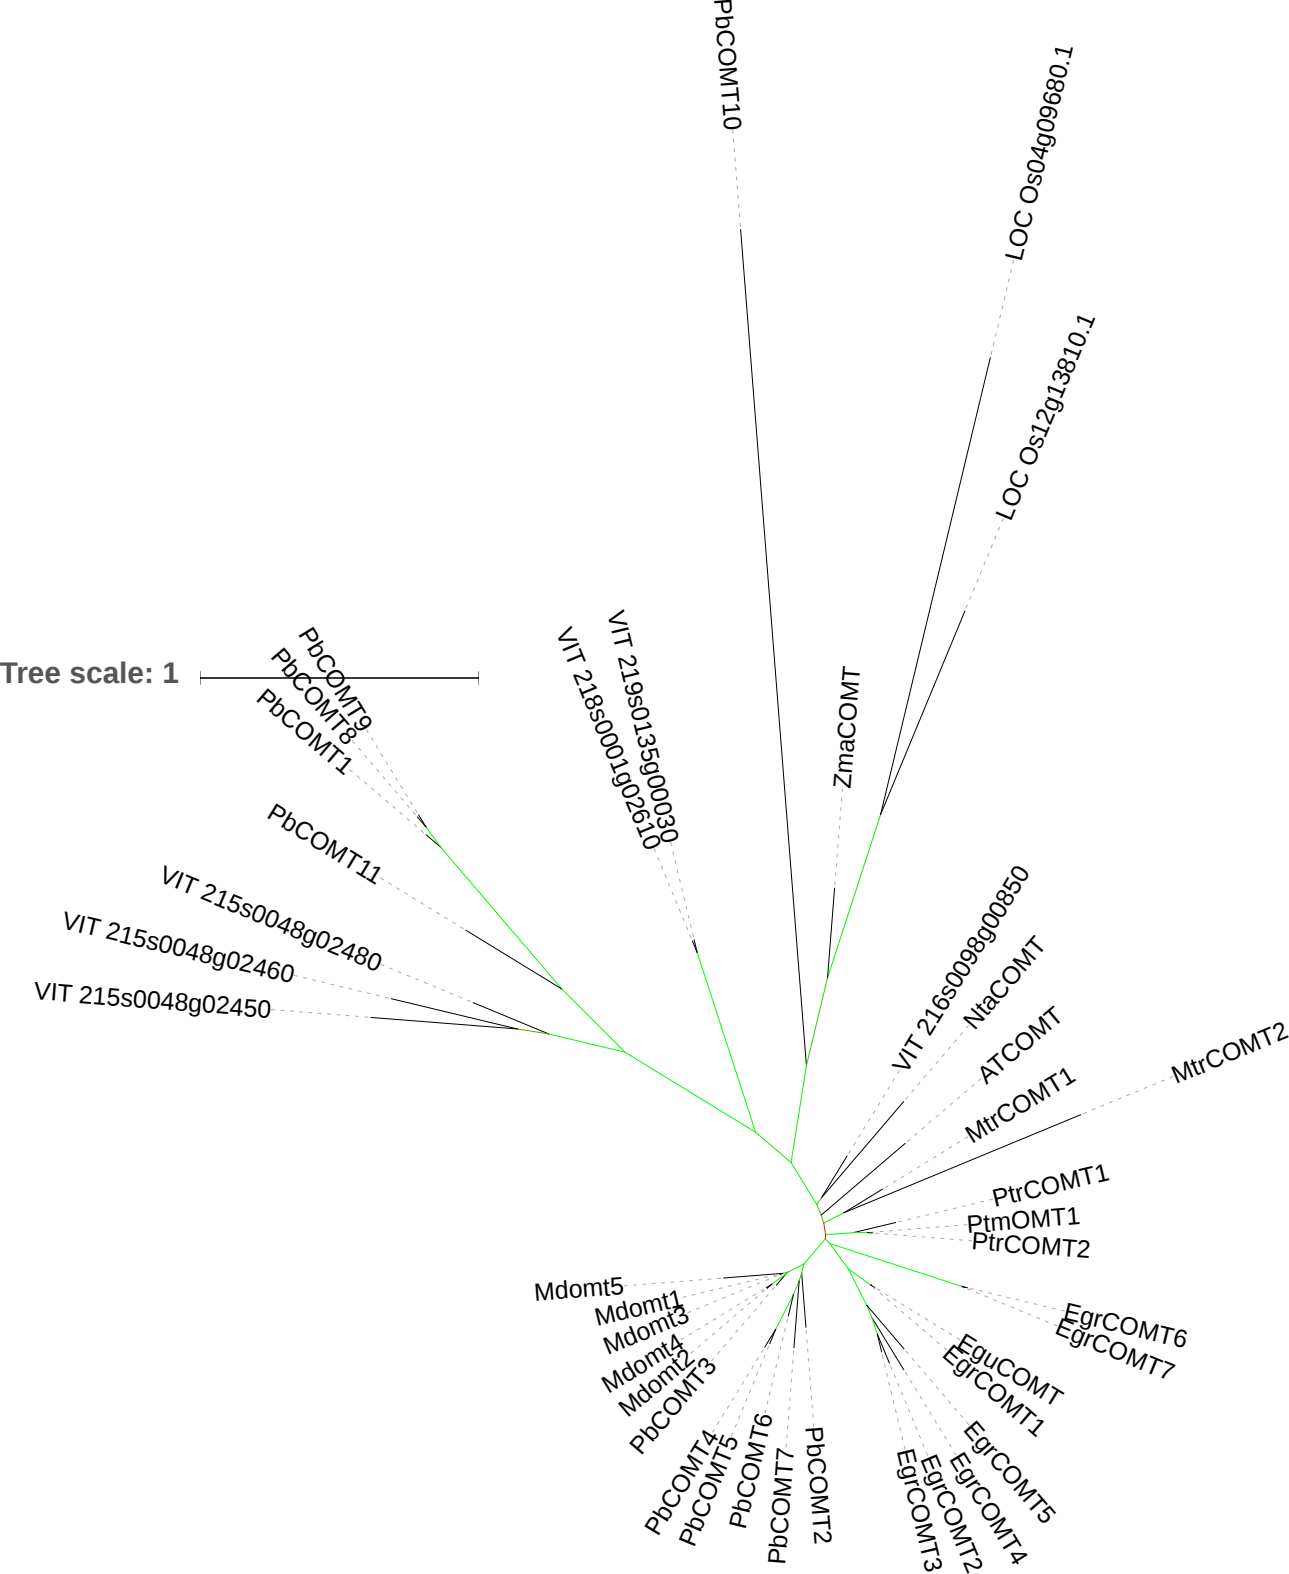

Supplement: s1 [file s1]
